# Supplementary material for: Continual Antigenic Diversification in China Leads to Global Antigenic Complexity of Avian Influenza H5N1 Viruses
Source: PubMed Central journal article supplement (PMC5337931; doi:10.1038/srep43566), 2017-03-06
Supplement: srep43566-s1.pdf [file srep43566-s1.pdf]

## Supplementary Information for

### **Continual Antigenic Diversification in China Leads to Global Antigenic Complexity of Avian Influenza H5N1 Viruses**

Yousong Peng<sup>1, 2, #</sup>, Xiaodan Li<sup>3, #</sup>, Hongbo Zhou<sup>4</sup>, Aiping Wu<sup>5, 6</sup>, Libo Dong<sup>3</sup>, Ye Zhang<sup>3</sup>,  
Rongbao Gao<sup>3</sup>, Hong Bo<sup>3</sup>, Lei Yang<sup>3</sup>, Dayan Wang<sup>3</sup>, Xian Lin<sup>4</sup>, Meilin Jin<sup>4</sup>\*, Yuelong Shu<sup>3</sup>\*,  
Taijiao Jiang<sup>2, 5, 6, \*</sup>

<sup>1</sup> College of Biology, Hunan University, Changsha 410082, China

<sup>2</sup> Institute of Biophysics, Chinese Academy of Sciences, Beijing 100101, China

<sup>3</sup> National Institute for Viral Disease Control and Prevention, China CDC, Beijing 100052, China

<sup>4</sup> College of Animal Science & Medicine, Huazhong Agricultural University, Wuhan 430070,  
China

<sup>5</sup> Center of System Medicine, Institute of Basic Medical Sciences, Chinese Academy of Medical  
Sciences & Peking Union Medical College, Beijing, 100005, China

<sup>6</sup> Suzhou Institute of Systems Medicine, Suzhou, Jiangsu, 215123, China

# These authors contributed equally to this work

\* Corresponding author: ML, +86-027-87286905, [jml8328@126.com](mailto:jml8328@126.com); YS, +86-010-58900850,  
[yshu@cnic.org.cn](mailto:yshu@cnic.org.cn); TJ, +86-010-64888427, [taijiao@ibms.pumc.edu.cn](mailto:taijiao@ibms.pumc.edu.cn)

## **Supplementary Methods**

**Isolation of the virus.** The viral samples obtained from poultry markets were maintained in a viral-transport medium at  $-80^{\circ}$  C until propagation. The specimens were propagated in the allantoic sac cavity of 9~11 days-old specific pathogen-free embryonated chicken eggs for 48 to 72 hours at  $37^{\circ}$  C.

**RNA extraction and RT-PCR.** RNA was extracted from virus isolates with the use of the QIAamp Viral RNA Mini Kit (Qiagen), according to the manufacturer's instructions. RT-PCR assays with specific primers for detecting H5N1 subtype were performed according to the protocols proposed by WHO <sup>1</sup>.

**Gene sequencing.** Full length HA gene was amplified for sequencing, with the use of Qiagen OneStep RT-PCR Kit. PCR products were purified from agarose gel with the use of the QIA quick Gel Extraction Kit (Qiagen). We performed the sequencing using an ABI 3730xl automatic DNA analyzer (Life Technologies) and the ABI Big Dye Terminator v3.1 cycle sequencing kit (Life Technologies), according to the manufacturers' recommendations. Full length HA sequences of the viruses were deposited in the Global Initiative on Sharing Avian Influenza Data

(GISAID) database<sup>2</sup> (Table S1).

### **Determine the best antigenic clustering with a HI dataset**

In MCL clustering, the inflation value is the only parameter which affects the cluster granularity in the MCL program<sup>3</sup>. It is usually chosen somewhere in a range: a bigger value will tend to result in fine-grained clusterings, and a smaller value will tend to result in very coarse grained clusterings. To determine the best inflation value under which the antigenic clustering could reflect the actual antigenic evolution of HPAI H5N1 viruses as accurate as possible, an antigenic dataset including 798 pairs of viruses with known antigenic relationship was constructed (available at <http://www.computationalbiology.cn/material/>). None of the pairs were used in the training of PREDAC-H5-C. All the viruses within the dataset were included in the antigenic clustering. They were grouped into ACs. The idea here is that if the antigenic clustering accurately captures the actual antigenic relationship of HPAI H5N1 viruses, the viruses within the predicted ACs should tend to be antigenically similar, while those between the predicted ACs should tend to be antigenically different. Therefore, we calculated the ratio of viral pairs which are both antigenic different and between ACs, or both antigenic similar and within ACs. The antigenic clustering with the highest ratio was chosen (Fig. S1).

## Supplementary Figures

**Figure S1:** the agreement rate between the antigenic data and the clustering versus the inflation value used in the clustering by MCL. The arrow refers to the inflation value (1.7) under which the final antigenic clustering was derived by MCL for further analysis in the manuscript.

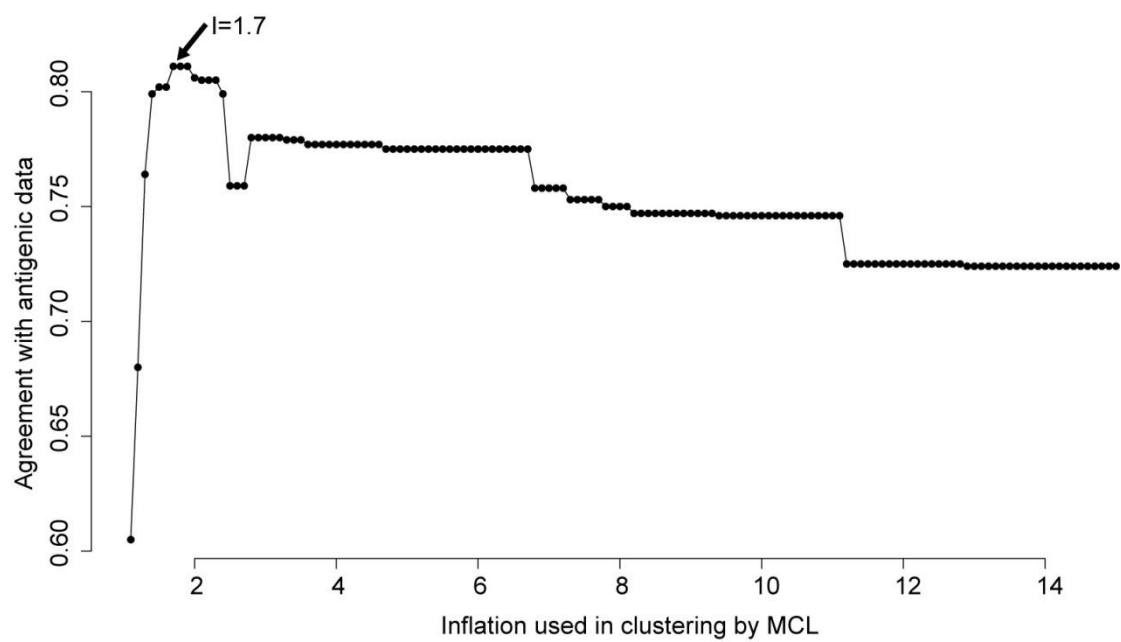



**Figure S3.** The number of co-circulating ACs each year in the globe from 1996 to 2015. The dashed line refers to the average yearly number of co-circulating ACs during this period.

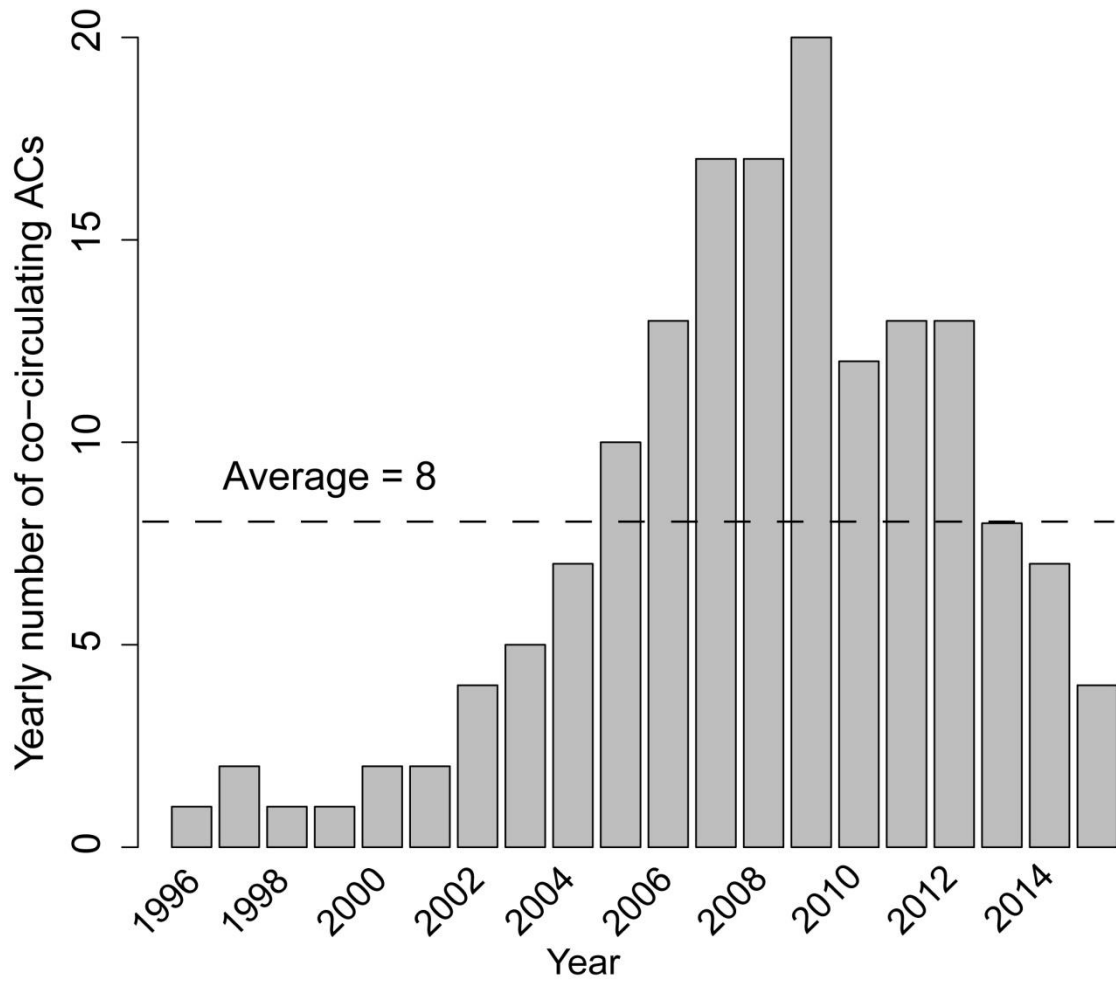

**Figure S4.** The country composition of the HPAI H5N1 viruses used in this study.

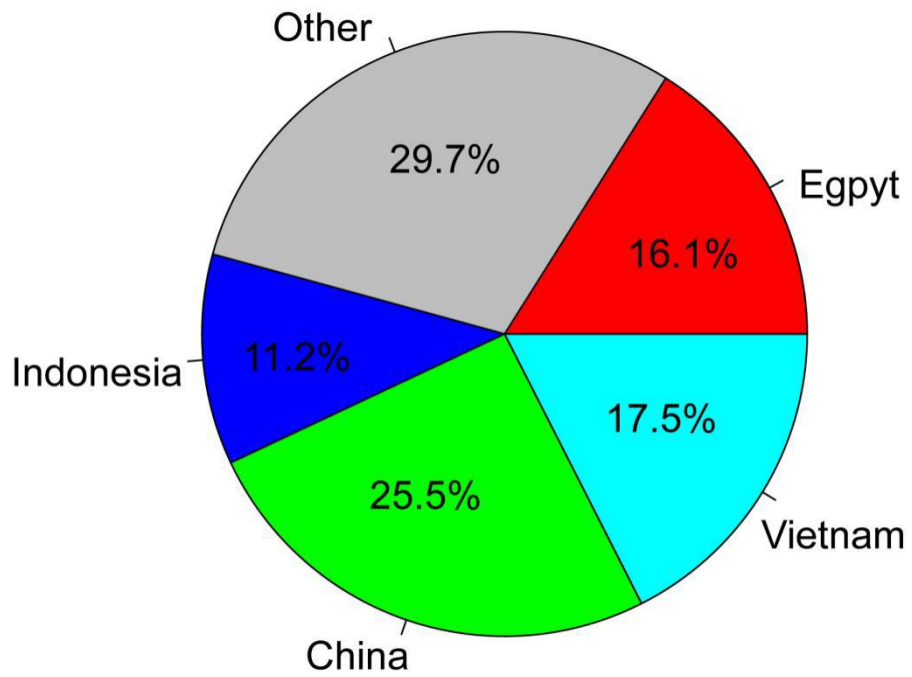

## Supplementary Tables

**Table S1.** Sequencing of 218 viruses in mainland China used in this study. The newly sequenced viruses included 36 viruses from poultry (chicken, duck, goose and pigeon), two viruses from wild birds (widgeon and heron), 14 viruses from swine and 166 viruses from environment.

| Isolate_Name             | Isolate_Id     | HA Segment_Id | Collection_Date |
|--------------------------|----------------|---------------|-----------------|
| A/Chicken/HuBei/14a/2004 | EPI_ISL_180527 | EPI593068     | 2004-12-30      |
| A/Duck/HuBei/Cg/2004     | EPI_ISL_180529 | EPI593070     | 2004-12-30      |
| A/Chicken/HuBei/41/2004  | EPI_ISL_179705 | EPI591023     | 2004-12-30      |
| A/Widgeon/HuBei/01/2004  | EPI_ISL_180571 | EPI593112     | 2004-12-30      |
| A/Chicken/HuBei/ZF/2004  | EPI_ISL_180528 | EPI593069     | 2004-12-30      |
| A/Chicken/HuNan/01/2006  | EPI_ISL_180530 | EPI593071     | 2006-01-10      |
| A/Chicken/HuNan/02/2006  | EPI_ISL_180531 | EPI593072     | 2006-02-28      |
| A/Swine/HuNan/01/2006    | EPI_ISL_180532 | EPI593073     | 2006-07-15      |
| A/Swine/jiangXi/01/2006  | EPI_ISL_180533 | EPI593074     | 2006-08-22      |
| A/Chicken/HuBei/01/2006  | EPI_ISL_180534 | EPI593075     | 2006-09-15      |
| A/Duck/HuNan/02/2006     | EPI_ISL_180535 | EPI593076     | 2006-09-28      |
| A/Duck/HuNan/03/2006     | EPI_ISL_180537 | EPI593078     | 2006-12-15      |
| A/Chicken/HuNan/03/2006  | EPI_ISL_180536 | EPI593077     | 2006-12-15      |
| A/Goose/HuNan/01/2006    | EPI_ISL_180538 | EPI593079     | 2006-12-19      |
| A/Chicken/HuNan/04/2006  | EPI_ISL_180539 | EPI593080     | 2006-12-22      |
| A/Duck/HuBei/01/2007     | EPI_ISL_180540 | EPI593081     | 2007-04-25      |
| A/Duck/HuBei/02/2007     | EPI_ISL_180541 | EPI593082     | 2007-11-14      |
| A/Chicken/HuBei/06/2007  | EPI_ISL_180542 | EPI593083     | 2007-11-25      |
| A/Chicken/HuBei/12/2007  | EPI_ISL_180545 | EPI593086     | 2007-12-01      |
| A/Pigeon/HuBei/01_1/2008 | EPI_ISL_180572 | EPI593113     | 2007-12-01      |
| A/Chicken/HuBei/11/2007  | EPI_ISL_180544 | EPI593085     | 2007-12-01      |
| A/Chicken/HuBei/10/2007  | EPI_ISL_180543 | EPI593084     | 2007-12-01      |
| A/Duck/HuBei/06/2007     | EPI_ISL_180546 | EPI593087     | 2007-12-15      |
| A/Pigeon/HuBei/01_2/2008 | EPI_ISL_180574 | EPI593115     | 2008-01-15      |
| A/Heron/HuBei/01/2007    | EPI_ISL_180573 | EPI593114     | 2008-01-20      |
| A/Swine/HuBei/03/2008    | EPI_ISL_180547 | EPI593088     | 2008-08-01      |



|                                |                |           |            |
|--------------------------------|----------------|-----------|------------|
| A/Swine/HuBei/07/2008          | EPI_ISL_180551 | EPI593092 | 2008-10-14 |
| A/Swine/HuBei/10-2/2008        | EPI_ISL_180575 | EPI593116 | 2008-10-14 |
| A/Swine/HuBei/05/2008          | EPI_ISL_180549 | EPI593090 | 2008-10-14 |
| A/Swine/HuBei/08/2008          | EPI_ISL_180552 | EPI593093 | 2008-10-14 |
| A/Swine/HuBei/04/2008          | EPI_ISL_180548 | EPI593089 | 2008-10-14 |
| A/Swine/HuBei/11/2008          | EPI_ISL_180554 | EPI593095 | 2008-10-14 |
| A/Swine/HuBei/06/2008          | EPI_ISL_180550 | EPI593091 | 2008-10-14 |
| A/Swine/HuBei/09/2008          | EPI_ISL_180553 | EPI593094 | 2008-10-14 |
| A/Chicken/HuBei/12/2008        | EPI_ISL_180555 | EPI593096 | 2008-12-22 |
| A/environment/ZheJiang/8/2009  | EPI_ISL_180525 | EPI593066 | 2009-01-01 |
| A/environment/ZheJiang/11/2009 | EPI_ISL_180519 | EPI593060 | 2009-01-01 |
| A/environment/ZheJiang/4/2009  | EPI_ISL_180524 | EPI593065 | 2009-01-01 |
| A/environment/ZheJiang/9/2009  | EPI_ISL_180526 | EPI593067 | 2009-01-01 |
| A/Swine/HuBei/02/2009          | EPI_ISL_180556 | EPI593097 | 2009-01-30 |
| A/Duck/HuBei/08/2009           | EPI_ISL_180563 | EPI593104 | 2009-02-13 |
| A/Chicken/ShanDong/01/2009     | EPI_ISL_180562 | EPI593103 | 2009-02-14 |
| A/environment/Jiangxi/8/2009   | EPI_ISL_180505 | EPI593046 | 2009-02-26 |
| A/environment/Jiangxi/13/2009  | EPI_ISL_180491 | EPI593032 | 2009-02-26 |
| A/environment/Jiangxi/10/2009  | EPI_ISL_180488 | EPI593029 | 2009-02-26 |
| A/environment/Jiangxi/5/2009   | EPI_ISL_180502 | EPI593043 | 2009-02-26 |
| A/environment/Jiangxi/3/2009   | EPI_ISL_180500 | EPI593041 | 2009-02-26 |
| A/environment/Jiangxi/7/2009   | EPI_ISL_180504 | EPI593045 | 2009-02-26 |
| A/environment/Jiangxi/2/2009   | EPI_ISL_180494 | EPI593035 | 2009-02-26 |
| A/environment/Jiangxi/6/2009   | EPI_ISL_180503 | EPI593044 | 2009-02-26 |
| A/environment/Jiangxi/4/2009   | EPI_ISL_180501 | EPI593042 | 2009-02-26 |
| A/environment/Jiangxi/1/2009   | EPI_ISL_180487 | EPI593028 | 2009-02-26 |
| A/environment/Jiangxi/12/2009  | EPI_ISL_180490 | EPI593031 | 2009-02-26 |
| A/environment/Jiangxi/9/2009   | EPI_ISL_180506 | EPI593047 | 2009-02-26 |
| A/environment/Jiangxi/11/2009  | EPI_ISL_180489 | EPI593030 | 2009-02-26 |
| A/environment/ZheJiang/2/2009  | EPI_ISL_180523 | EPI593064 | 2009-03-03 |
| A/environment/ZheJiang/1/2009  | EPI_ISL_180518 | EPI593059 | 2009-03-03 |
| A/environment/JiangXi/22/2009  | EPI_ISL_180497 | EPI593038 | 2009-04-17 |
| A/environment/JiangXi/23/2009  | EPI_ISL_180498 | EPI593039 | 2009-04-17 |
| A/environment/JiangXi/21/2009  | EPI_ISL_180496 | EPI593037 | 2009-04-17 |
| A/Swine/HuBei/06-2/2009        | EPI_ISL_180576 | EPI593117 | 2009-05-24 |
| A/Duck/HuBei/03/2009           | EPI_ISL_180558 | EPI593099 | 2009-07-09 |
| A/Duck/HuBei/04/2009           | EPI_ISL_180559 | EPI593100 | 2009-07-09 |
| A/Duck/HuBei/13/2009           | EPI_ISL_180560 | EPI593101 | 2009-07-09 |
| A/Duck/HuBei/02/2009           | EPI_ISL_180557 | EPI593098 | 2009-07-09 |
| A/swine/SiChuan/1/2009         | EPI_ISL_180564 | EPI593105 | 2009-08-03 |
| A/Chicken/HuBei/07/2009        | EPI_ISL_180561 | EPI593102 | 2009-08-05 |
| A/environment/WuHan/03/2009    | EPI_ISL_180512 | EPI593053 | 2009-12-02 |
| A/environment/Anhui/05/2010    | EPI_ISL_180363 | EPI592904 | 2009-12-29 |

|                                 |                |           |            |
|---------------------------------|----------------|-----------|------------|
| A/environment/Fujian/02/2010    | EPI_ISL_180435 | EPI592976 | 2010-01-19 |
| A/environment/Fujian/32/2010    | EPI_ISL_180454 | EPI592995 | 2010-01-19 |
| A/environment/Fujian/06/2010    | EPI_ISL_180438 | EPI592979 | 2010-02-08 |
| A/environment/Fujian/04/2010    | EPI_ISL_180436 | EPI592977 | 2010-02-08 |
| A/environment/Fujian/05/2010    | EPI_ISL_180437 | EPI592978 | 2010-02-08 |
| A/environment/Fujian/07/2010    | EPI_ISL_180439 | EPI592980 | 2010-02-08 |
| A/environment/Chongqing/37/2010 | EPI_ISL_180422 | EPI592963 | 2010-02-09 |
| A/environment/Chongqing/36/2010 | EPI_ISL_180421 | EPI592962 | 2010-02-09 |
| A/environment/Chongqing/6/2010  | EPI_ISL_180431 | EPI592972 | 2010-02-22 |
| A/environment/Chongqing/8/2010  | EPI_ISL_180433 | EPI592974 | 2010-02-22 |
| A/environment/Chongqing/7/2010  | EPI_ISL_180432 | EPI592973 | 2010-02-22 |
| A/environment/Chongqing/5/2010  | EPI_ISL_180426 | EPI592967 | 2010-02-22 |
| A/environment/Fujian/36/2010    | EPI_ISL_180455 | EPI592996 | 2010-03-15 |
| A/environment/Fujian/16/2010    | EPI_ISL_180447 | EPI592988 | 2010-03-15 |
| A/environment/Fujian/37/2010    | EPI_ISL_180456 | EPI592997 | 2010-03-17 |
| A/environment/Fujian/12/2010    | EPI_ISL_180444 | EPI592985 | 2010-03-17 |
| A/environment/Fujian/40/2010    | EPI_ISL_180458 | EPI592999 | 2010-03-17 |
| A/environment/Fujian/10/2010    | EPI_ISL_180442 | EPI592983 | 2010-03-17 |
| A/environment/Fujian/15/2010    | EPI_ISL_180446 | EPI592987 | 2010-03-17 |
| A/environment/Fujian/41/2010    | EPI_ISL_180459 | EPI593000 | 2010-03-17 |
| A/environment/Fujian/14/2010    | EPI_ISL_180445 | EPI592986 | 2010-03-17 |
| A/environment/Fujian/39/2010    | EPI_ISL_180457 | EPI592998 | 2010-03-17 |
| A/environment/Fujian/11/2010    | EPI_ISL_180443 | EPI592984 | 2010-03-17 |
| A/environment/Chongqing/9/2010  | EPI_ISL_180434 | EPI592975 | 2010-03-23 |
| A/environment/Chongqing/16/2010 | EPI_ISL_180402 | EPI592943 | 2010-03-23 |
| A/environment/Chongqing/14/2010 | EPI_ISL_180400 | EPI592941 | 2010-03-23 |
| A/environment/Chongqing/23/2010 | EPI_ISL_180416 | EPI592957 | 2010-03-23 |
| A/environment/Chongqing/41/2010 | EPI_ISL_180423 | EPI592964 | 2010-03-25 |
| A/Duck/HuBei/06/2010            | EPI_ISL_180568 | EPI593109 | 2010-03-28 |
| A/Duck/HuBei/01/2010            | EPI_ISL_180565 | EPI593106 | 2010-03-28 |
| A/Duck/HuBei/05/2010            | EPI_ISL_180567 | EPI593108 | 2010-03-28 |
| A/Chicken/HuNan/01/2010         | EPI_ISL_180566 | EPI593107 | 2010-03-28 |
| A/environment/Jiangxi/14/2011   | EPI_ISL_180492 | EPI593033 | 2010-03-29 |
| A/environment/Chongqing/51/2010 | EPI_ISL_180427 | EPI592968 | 2010-03-31 |
| A/environment/Guizhou/01/2010   | EPI_ISL_180473 | EPI593014 | 2010-04-01 |
| A/environment/FuJian/21/2010    | EPI_ISL_180450 | EPI592991 | 2010-04-11 |
| A/environment/Fujian/20/2010    | EPI_ISL_180449 | EPI592990 | 2010-04-11 |
| A/environment/Fujian/26/2010    | EPI_ISL_180453 | EPI592994 | 2010-04-12 |
| A/environment/Fujian/18/2010    | EPI_ISL_180448 | EPI592989 | 2010-04-15 |
| A/environment/Chongqing/21/2010 | EPI_ISL_180412 | EPI592953 | 2010-04-21 |
| A/environment/Chongqing/12/2010 | EPI_ISL_180399 | EPI592940 | 2010-04-21 |
| A/environment/Chongqing/17/2010 | EPI_ISL_180404 | EPI592945 | 2010-04-21 |
| A/environment/Hunan/01/2010     | EPI_ISL_180480 | EPI593021 | 2010-04-21 |

|                                 |                |           |            |
|---------------------------------|----------------|-----------|------------|
| A/environment/Chongqing/19/2010 | EPI_ISL_180408 | EPI592949 | 2010-04-21 |
| A/environment/Chongqing/18/2010 | EPI_ISL_180406 | EPI592947 | 2010-04-21 |
| A/environment/Chongqing/20/2010 | EPI_ISL_180410 | EPI592951 | 2010-04-21 |
| A/environment/Chongqing/42/2010 | EPI_ISL_180424 | EPI592965 | 2010-04-30 |
| A/environment/Chongqing/43/2010 | EPI_ISL_180425 | EPI592966 | 2010-04-30 |
| A/environment/Chongqing/55/2010 | EPI_ISL_180428 | EPI592969 | 2010-05-19 |
| A/environment/Chongqing/56/2010 | EPI_ISL_180429 | EPI592970 | 2010-05-19 |
| A/Duck/HuBei/09/2010            | EPI_ISL_180570 | EPI593111 | 2010-07-10 |
| A/Duck/HuBei/08/2010            | EPI_ISL_180569 | EPI593110 | 2010-07-10 |
| A/environment/Guizhou/02/2010   | EPI_ISL_180474 | EPI593015 | 2010-08-01 |
| A/environment/Guizhou/06/2010   | EPI_ISL_180477 | EPI593018 | 2010-08-20 |
| A/environment/Guizhou/03/2010   | EPI_ISL_180475 | EPI593016 | 2010-08-20 |
| A/Duck/HuBei/10-2/2010          | EPI_ISL_180577 | EPI593118 | 2010-08-20 |
| A/environment/Chongqing/22/2010 | EPI_ISL_180414 | EPI592955 | 2010-09-21 |
| A/environment/Chongqing/24/2010 | EPI_ISL_180418 | EPI592959 | 2010-09-21 |
| A/environment/Fujian/22/2010    | EPI_ISL_180451 | EPI592992 | 2010-10-12 |
| A/environment/Guangdong/01/2010 | EPI_ISL_180461 | EPI593002 | 2010-11-15 |
| A/environment/Chongqing/57/2010 | EPI_ISL_180430 | EPI592971 | 2010-11-15 |
| A/environment/FuJian/24/2010    | EPI_ISL_180452 | EPI592993 | 2010-11-16 |
| A/environment/Guizhou/05/2010   | EPI_ISL_180476 | EPI593017 | 2010-12-01 |
| A/environment/Chongqing/29/2010 | EPI_ISL_180420 | EPI592961 | 2010-12-08 |
| A/environment/Chongqing/26/2010 | EPI_ISL_180361 | EPI592902 | 2010-12-08 |
| A/environment/Zhejiang/12/2010  | EPI_ISL_180521 | EPI593062 | 2010-12-13 |
| A/environment/ZheJiang/11/2010  | EPI_ISL_180520 | EPI593061 | 2010-12-13 |
| A/environment/Guangxi/03/2010   | EPI_ISL_180466 | EPI593007 | 2010-12-17 |
| A/environment/Zhejiang/13/2010  | EPI_ISL_180522 | EPI593063 | 2010-12-29 |
| A/environment/Hunan/05/2011     | EPI_ISL_180482 | EPI593023 | 2011-01-18 |
| A/environment/Hunan/03/2011     | EPI_ISL_180481 | EPI593022 | 2011-01-18 |
| A/environment/Chongqing/10/2011 | EPI_ISL_180397 | EPI592938 | 2011-01-24 |
| A/environment/Chongqing/11/2011 | EPI_ISL_180398 | EPI592939 | 2011-01-24 |
| A/environment/Chongqing/09/2011 | EPI_ISL_180396 | EPI592937 | 2011-01-24 |
| A/environment/Chongqing/23/2011 | EPI_ISL_180417 | EPI592958 | 2011-01-25 |
| A/environment/Chongqing/24/2011 | EPI_ISL_180419 | EPI592960 | 2011-01-25 |
| A/environment/Xinjiang/01/2011  | EPI_ISL_180513 | EPI593054 | 2011-01-26 |
| A/environment/Xinjiang/02/2011  | EPI_ISL_180514 | EPI593055 | 2011-01-26 |
| A/environment/Hunan/07/2011     | EPI_ISL_180483 | EPI593024 | 2011-01-26 |
| A/environment/Chongqing/07/2011 | EPI_ISL_180394 | EPI592935 | 2011-02-22 |
| A/environment/Chongqing/06/2011 | EPI_ISL_180393 | EPI592934 | 2011-02-22 |
| A/environment/Chongqing/03/2011 | EPI_ISL_180390 | EPI592931 | 2011-03-22 |
| A/environment/Chongqing/05/2011 | EPI_ISL_180392 | EPI592933 | 2011-03-22 |
| A/environment/Chongqing/22/2011 | EPI_ISL_180415 | EPI592956 | 2011-03-22 |
| A/environment/Chongqing/04/2011 | EPI_ISL_180391 | EPI592932 | 2011-03-22 |
| A/environment/Jiangxi/16/2011   | EPI_ISL_180493 | EPI593034 | 2011-03-24 |

|                                    |                |           |            |
|------------------------------------|----------------|-----------|------------|
| A/environment/Chongqing/01908/2011 | EPI_ISL_180370 | EPI592911 | 2011-04-12 |
| A/environment/Chongqing/01903/2011 | EPI_ISL_180368 | EPI592909 | 2011-04-12 |
| A/environment/Chongqing/01904/2011 | EPI_ISL_180369 | EPI592910 | 2011-04-12 |
| A/environment/Sichuan/01/2011      | EPI_ISL_180510 | EPI593051 | 2011-04-14 |
| A/environment/Chongqing/21/2011    | EPI_ISL_180413 | EPI592954 | 2011-04-28 |
| A/environment/Xinjiang/03/2011     | EPI_ISL_180516 | EPI593057 | 2011-04-28 |
| A/environment/Chongqing/01891/2011 | EPI_ISL_180367 | EPI592908 | 2011-05-26 |
| A/environment/Chongqing/16/2011    | EPI_ISL_180403 | EPI592944 | 2011-05-26 |
| A/environment/Chongqing/19/2011    | EPI_ISL_180409 | EPI592950 | 2011-05-26 |
| A/environment/Chongqing/20/2011    | EPI_ISL_180411 | EPI592952 | 2011-05-26 |
| A/environment/Chongqing/18/2011    | EPI_ISL_180407 | EPI592948 | 2011-05-26 |
| A/environment/Chongqing/17/2011    | EPI_ISL_180405 | EPI592946 | 2011-05-26 |
| A/environment/Shaanxi/02011/2012   | EPI_ISL_180508 | EPI593049 | 2011-06-22 |
| A/environment/Shaanxi/04/2011      | EPI_ISL_180509 | EPI593050 | 2011-07-03 |
| A/environment/Shaanxi/01/2011      | EPI_ISL_180507 | EPI593048 | 2011-07-03 |
| A/environment/Chongqing/08/2011    | EPI_ISL_180395 | EPI592936 | 2011-07-28 |
| A/environment/Gansu/02071/2011     | EPI_ISL_180460 | EPI593001 | 2011-08-25 |
| A/environment/Chongqing/15/2011    | EPI_ISL_180401 | EPI592942 | 2011-10-18 |
| A/environment/Wuhan/02/2011        | EPI_ISL_180511 | EPI593052 | 2011-11-09 |
| A/Environment/Xizang/07518/2011    | EPI_ISL_180517 | EPI593058 | 2011-12-25 |
| A/environment/Guangdong/01277/2012 | EPI_ISL_180463 | EPI593004 | 2012-01-09 |
| A/environment/Guangdong/01271/2012 | EPI_ISL_180462 | EPI593003 | 2012-01-09 |
| A/environment/Chongqing/02418/2012 | EPI_ISL_180375 | EPI592916 | 2012-01-11 |
| A/environment/Chongqing/02393/2011 | EPI_ISL_180371 | EPI592912 | 2012-01-13 |
| A/environment/Chongqing/02412/2012 | EPI_ISL_180373 | EPI592914 | 2012-02-09 |
| A/environment/Chongqing/02415/2012 | EPI_ISL_180374 | EPI592915 | 2012-02-09 |
| A/environment/Chongqing/02409/2012 | EPI_ISL_180372 | EPI592913 | 2012-02-09 |
| A/environment/Jiangxi/02128/2012   | EPI_ISL_180485 | EPI593026 | 2012-02-22 |
| A/environment/Jiangxi/02165/2012   | EPI_ISL_180486 | EPI593027 | 2012-04-10 |
| A/environment/Chongqing/02454/2012 | EPI_ISL_180380 | EPI592921 | 2012-04-16 |
| A/environment/Chongqing/02455/2012 | EPI_ISL_180381 | EPI592922 | 2012-04-16 |
| A/environment/Chongqing/02449/2012 | EPI_ISL_180378 | EPI592919 | 2012-04-16 |
| A/environment/Chongqing/02450/2012 | EPI_ISL_180379 | EPI592920 | 2012-04-16 |
| A/environment/Chongqing/02436/2012 | EPI_ISL_180377 | EPI592918 | 2012-04-20 |
| A/environment/Chongqing/02433/2012 | EPI_ISL_180376 | EPI592917 | 2012-05-18 |
| A/environment/Hunan/00245/2013     | EPI_ISL_180479 | EPI593020 | 2012-07-04 |
| A/environment/Chongqing/02648/2011 | EPI_ISL_180382 | EPI592923 | 2012-07-12 |
| A/environment/Chongqing/02933/2012 | EPI_ISL_180388 | EPI592929 | 2012-07-18 |
| A/environment/Xinjiang/02678/2012  | EPI_ISL_180515 | EPI593056 | 2012-07-25 |
| A/environment/Chongqing/02917/2012 | EPI_ISL_180384 | EPI592925 | 2012-08-16 |
| A/environment/Chongqing/02916/2012 | EPI_ISL_180383 | EPI592924 | 2012-08-16 |
| A/environment/Chongqing/02920/2012 | EPI_ISL_180385 | EPI592926 | 2012-08-17 |
| A/environment/Chongqing/02934/2012 | EPI_ISL_180389 | EPI592930 | 2012-09-14 |

|                                    |                |           |            |
|------------------------------------|----------------|-----------|------------|
| A/environment/Chongqing/02927/2012 | EPI_ISL_180386 | EPI592927 | 2012-10-16 |
| A/environment/Chongqing/02930/2012 | EPI_ISL_180387 | EPI592928 | 2012-10-16 |
| A/environment/Guangxi/00131/2013   | EPI_ISL_180465 | EPI593006 | 2012-12-05 |
| A/environment/Guizhou/00320/2013   | EPI_ISL_180472 | EPI593013 | 2013-02-10 |
| A/environment/Guizhou/00318/2013   | EPI_ISL_180471 | EPI593012 | 2013-02-11 |
| A/environment/Guizhou/00314/2013   | EPI_ISL_180470 | EPI593011 | 2013-02-11 |
| A/environment/Guizhou/00312/2013   | EPI_ISL_180469 | EPI593010 | 2013-02-13 |
| A/environment/Guizhou/00311/2013   | EPI_ISL_180468 | EPI593009 | 2013-02-13 |
| A/environment/Guizhou/00310/2013   | EPI_ISL_180467 | EPI593008 | 2013-02-13 |
| A/environment/Chongqing/00410/2013 | EPI_ISL_180365 | EPI592906 | 2013-02-17 |
| A/environment/Chongqing/00408/2013 | EPI_ISL_180364 | EPI592905 | 2013-02-18 |
| A/Environment/Hubei/00950/2013     | EPI_ISL_180478 | EPI593019 | 2013-02-26 |
| A/environment/Anhui/00464/2013     | EPI_ISL_180362 | EPI592903 | 2013-03-18 |
| A/environment/Chongqing/00510/2013 | EPI_ISL_180366 | EPI592907 | 2013-03-19 |
| A/environment/Jiangxi/00433/2013   | EPI_ISL_180484 | EPI593025 | 2013-03-21 |
| A/Environment/Guangdong/07336/2013 | EPI_ISL_180464 | EPI593005 | 2013-10-14 |
| A/Environment/Fujian/08415/2013    | EPI_ISL_180441 | EPI592982 | 2013-10-30 |
| A/Environment/Fujian/08414/2013    | EPI_ISL_180440 | EPI592981 | 2013-10-30 |
| A/Environment/Jiangxi/20983/2013   | EPI_ISL_180495 | EPI593036 | 2013-11-26 |
| A/Environment/Jiangxi/23094/2013   | EPI_ISL_180499 | EPI593040 | 2013-12-14 |

**Table S2.** The detailed information about the ACs predicted by PREDAC-H5-C. The table shows the number of sequences in each AC, the time range and the clade composition of each AC. The major ACs are highlighted by the bold type; the remaining are the minor clusters. For clarity, only the clades with ratio greater than 1% are given in the table.

| Cluster ID | Cluster Name | Sequence number | Year range | Clades composition                                                                                                                                                                                                                                                                           |
|------------|--------------|-----------------|------------|----------------------------------------------------------------------------------------------------------------------------------------------------------------------------------------------------------------------------------------------------------------------------------------------|
| 1          | <b>QH05</b>  | 1570            | 2004-2015  | 2.2.1=0.511 2.2=0.397 2.2.2=0.037<br>2.2.2.1=0.034 2.2-like=0.019 2-like=0.001<br>2.2.1-like=0.001 2.5=0.001 2.1-like=0.001                                                                                                                                                                  |
| 2          | <b>HK07</b>  | 861             | 2007-2015  | 2.3.2.1c=0.472 2.3.2.1a=0.387<br>2.3.2.1=0.136 2.3.2=0.005<br>2.3.2.1-like=0.001                                                                                                                                                                                                             |
| 3          | <b>AH05</b>  | 840             | 2003-2013  | 2.3.4=0.595 2.3.4.3=0.212 2.3.4.2=0.098<br>2.3.4.1=0.074 2.1.3.3=0.007<br>2.3-like=0.007 2.1.3=0.001 9=0.001<br>2.3.2=0.001 2.3.4.4=0.001 1=0.001<br>2.3.1=0.001                                                                                                                             |
| 4          | <b>HN02</b>  | 476             | 2000-2009  | 3=0.118 0=0.113 9=0.107 2.1.1=0.107<br>2.1.2=0.086 7=0.067 2.3.3=0.063 1=0.057<br>5=0.055 2.4=0.038 2.3.1=0.036 2.5=0.029<br>6=0.019 2-like=0.019 1-2-like=0.015<br>1-2-5-6-8-9-like=0.015 5-6-like=0.013<br>2.1.3.1=0.011 2.1-like=0.011 4=0.011<br>8=0.008 1-2-9-like=0.002 2.3-like=0.002 |
| 5          | <b>VN04</b>  | 706             | 2002-2014  | 1=0.71 1.1.2=0.12 1.1=0.091 1.1.1=0.064<br>1.1-like=0.013 0=0.001 9=0.001                                                                                                                                                                                                                    |
| 6          | <b>ID05</b>  | 386             | 1997-2012  | 2.1.3.2=0.751 2.1.3=0.104 2.1.3.3=0.06<br>2.1.3.1=0.044 2.4=0.021 2.1.1=0.018<br>7=0.003                                                                                                                                                                                                     |
| 7          | <b>EG08</b>  | 123             | 2007-2014  | 2.2.1.1a=0.707 2.2.1.1=0.293                                                                                                                                                                                                                                                                 |
| 8          | <b>ID11</b>  | 102             | 2006-2015  | 2.1.3.2a=0.931 2.1.3.2=0.069                                                                                                                                                                                                                                                                 |
| 9          | <b>GD96</b>  | 89              | 1996-2008  | 0=0.989 1-2-5-6-8-9-like=0.011                                                                                                                                                                                                                                                               |
| 10         | <b>GD04</b>  | 102             | 2004-2007  | 2.3.2=0.951 2.1.1=0.049                                                                                                                                                                                                                                                                      |
| 11         | <b>HK10</b>  | 56              | 2009-2012  | 2.3.2.1b=0.982 2.3.2.1-like=0.018                                                                                                                                                                                                                                                            |
| 12         | <b>EG07</b>  | 64              | 2007-2009  | 2.2.1.1=1                                                                                                                                                                                                                                                                                    |
| 13         | <b>HK08</b>  | 42              | 2008-2012  | 2.3.4=1                                                                                                                                                                                                                                                                                      |

|    |             |    |           |            |
|----|-------------|----|-----------|------------|
| 14 | Minor-14    | 12 | 2009-2013 | 7.2=1      |
| 15 | Minor-15    | 13 | 2009-2010 | 2.2.1.1=1  |
| 16 | Minor-16    | 9  | 2005-2007 | 7=1        |
| 17 | <b>JX13</b> | 9  | 2009-2014 | 2.3.4.4=1  |
| 18 | Minor-18    | 18 | 2002-2006 | 4=1        |
| 19 | Minor-19    | 7  | 2009-2011 | 2.1.3.1=1  |
| 20 | Minor-20    | 19 | 2008-2008 | 7.1=1      |
| 21 | <b>GZ13</b> | 10 | 2011-2013 | 2.3.4.2=1  |
| 22 | Minor-22    | 7  | 2007-2009 | 2.2.1.1=1  |
| 23 | Minor-23    | 6  | 2007-2007 | 2.2.1=1    |
| 24 | Minor-24    | 5  | 2011-2012 | 2.3.2.1b=1 |
| 25 | Minor-25    | 10 | 2006-2008 | 2.1.3.2=1  |
| 26 | Minor-26    | 6  | 2008-2009 | 7.2=1      |
| 27 | Minor-27    | 5  | 2007-2008 | 7.2=1      |
| 28 | Minor-28    | 4  | 2007-2008 | 2.3.4=1    |
| 29 | Minor-29    | 6  | 2009-2009 | 2.3.4=1    |
| 30 | Minor-30    | 3  | 2008-2009 | 7.2=1      |
| 31 | Minor-31    | 4  | 2007-2009 | 2.1.3.2=1  |
| 32 | Minor-32    | 5  | 2014-2015 | 2.3.2.1c=1 |
| 33 | Minor-33    | 2  | 2006-2006 | 2.5=1      |
| 34 | Minor-34    | 3  | 2005-2006 | 2.3.4=1    |
| 35 | Minor-35    | 2  | 2007-2012 | 2.3.4=1    |
| 36 | Minor-36    | 2  | 2010-2010 | 2.1.3.2a=1 |

**Table S3.** The antigenic relationship between vaccine strains for clade 2.2, and its sub-clades 2.2.1 and 2.2.1.1. The elements in gray-shaded refers to the rAHM distance <sup>4</sup> (which indicate antigenic similarity when it is small than 4), or the rNHT distance <sup>4</sup> (marked by asterisk, which indicate antigenic similarity when it is small than 8). “S”, antigenic similar; “D”, antigenic different; “-“, no data available; WS244, A/WhooperSwan/Mongolia/244/2005; BHG05, A/Bar-headedGoose/Qinghai/1A/2005; IN33487, A/Chicken/India/Niv-33487/2006; EG2321, A/Egypt/2321-NAMRU3/2007; TK05, A/Turkey/Turkey/1/2005; EG3072, A/Egypt/N03072/2010; EG3300, A/Egypt/3300-NAMRU3/2008.



| <i>Vaccine</i> | <i>Clade</i>   | <i>WS244</i> | <i>BHG05</i> | <i>IN33487</i> | <i>EG2321</i> | <i>TK05</i> | <i>EG3072</i> | <i>EG3300</i> |
|----------------|----------------|--------------|--------------|----------------|---------------|-------------|---------------|---------------|
| <i>WS244</i>   | <i>2.2</i>     |              | <i>S</i>     | <i>S</i>       | <i>D</i>      | <i>S</i>    | -             | <i>D</i>      |
| <i>BHG05</i>   | <i>2.2</i>     | <i>1</i>     |              | <i>S</i>       | <i>S</i>      | <i>S</i>    | -             | <i>D</i>      |
| <i>IN33487</i> | <i>2.2</i>     | <i>1</i>     | <i>1*</i>    |                | <i>S</i>      | <i>S</i>    | -             | -             |
| <i>EG2321</i>  | <i>2.2.1</i>   | <i>4</i>     | <i>2</i>     | <i>4*</i>      |               | <i>D</i>    | <i>S</i>      | <i>D</i>      |
| <i>TK05</i>    | <i>2.2.1</i>   | <i>1.4</i>   | <i>2</i>     | <i>2*</i>      | <i>4</i>      |             | <i>S</i>      | <i>D</i>      |
| <i>EG3072</i>  | <i>2.2.1</i>   | -            | -            | -              | <i>2.8</i>    | <i>2</i>    |               | <i>D</i>      |
| <i>EG3300</i>  | <i>2.2.1.1</i> | <i>61</i>    | <i>25</i>    | -              | <i>144</i>    | <i>196</i>  | <i>362</i>    |               |

**Table S4.** The HI assay between six representative viruses of four antigenic clusters which were mainly composed of viruses of clade 2.3.4 and its sub-clades. Titers in bold refer to the homogenous titers.

| Test viruses                     | Antigenic clusters | Clade   | Anti-sera (ferret) |             |            |
|----------------------------------|--------------------|---------|--------------------|-------------|------------|
|                                  |                    |         | Anhui05            | HK/AP156/08 | Guizhou/13 |
| A/Anhui/1/2005<br>(IBCDC-RG6)    | AH05               | 2.3.4   | <b>160</b>         | 320         | 160        |
| A/Chick/HK/AP156/2008<br>(SJ002) | Minor-28           | 2.3.4   | <20                | <b>640</b>  | 80         |
| A/Guizhou/1/2013<br>(RG35)       | GZ13               | 2.3.4.2 | 20                 | 160         | <b>320</b> |
| Duck/Hangmei/01/06               | AH05               | 2.3.4   | 80                 | 80          | 160        |
| Enviroment/Chongqing/16<br>/11   | AH05               | 2.3.4   | 40                 | 80          | 80         |
| Enviroment/Jiangxi/20983/<br>13  | JX13               | 2.3.4.4 | <20                | 20          | <20        |

**Table S5.** The inferred time for the most recent common ancestor, the inferred most probable source country, the earliest and latest emergence time for the major ACs.

| AC   | Source Time (95% confidence level) | Earliest emergence time | Latest emergence time | Source country (probability) |
|------|------------------------------------|-------------------------|-----------------------|------------------------------|
| GD96 | 1991-11-3 (1987-7-22 ~ 1994-11-1)  | 1996                    | 2008-8-9              | China (0.96)                 |
| HN02 | 1995-1-14 (1993-3-9 ~ 1996-5-13)   | 2000                    | 2009-2-21             | China (1)                    |
| VN04 | 1995-1-14 (1993-3-9 ~ 1996-5-13)   | 2002                    | 2014-1-28             | China (1)                    |
| ID05 | 1995-9-9 (1994-3-5 ~ 1996-8-15)    | 1997                    | 2012                  | China (0.99)                 |
| AH05 | 2001-3-25 (2000-6-8 ~ 2001-12-14)  | 2003                    | 2013-6-5              | China (1)                    |
| GD04 | 2001-3-25 (2000-6-8 ~ 2001-12-14)  | 2004-6-29               | 2007-5-29             | China (1)                    |
| QH05 | 2002-1-13 (2001-5-29 ~ 2002-8-1)   | 2004                    | 2015-6-28             | China (0.99)                 |
| HK07 | 2006-1-25 (2005-6-29 ~ 2006-8-9)   | 2007-5-13               | 2015-8-6              | China (1)                    |
| ID11 | 2006-4-23 (2005-10-13 ~ 2006-10-4) | 2006-10-14              | 2015-3-24             | Indonesia (1)                |
| EG07 | 2006-7-10 (2006-1-31 ~ 2006-12-5)  | 2007                    | 2009-10-1             | Egypt (1)                    |
| EG08 | 2007-2-25 (2006-10-9 ~ 2007-6-18)  | 2007-7-29               | 2014-11-1             | Egypt (1)                    |
| HK08 | 2007-8-17 (2007-3-17 ~ 2007-12-6)  | 2008                    | 2012-3-3              | China (1)                    |
| HK10 | 2008-4-2 (2007-9-7 ~ 2008-9-30)    | 2009-5-5                | 2012-9-21             | China (1)                    |
| JX13 | 2009-9-14 (2009-5-5 ~ 2009-12-10)  | 2009-12-10              | 2014-1-10             | China (1)                    |
| GZ13 | 2010-8-24 (2009-12-31 ~ 2011-2-26) | 2011-4-12               | 2013-2-13             | China (1)                    |

**Table S6:** The ratio of viruses isolated from four hot-spot countries (China, Indonesia, Vietnam and Egypt) for each major antigenic clusters (ACs).

| AC   | Ratio | AC   | Ratio | AC   | Ratio | AC   | Ratio | AC   | Ratio |
|------|-------|------|-------|------|-------|------|-------|------|-------|
| AH05 | 0.91  | GD04 | 1     | HK07 | 0.53  | HN02 | 0.97  | JX13 | 1     |
| EG07 | 0.98  | GD96 | 1     | HK08 | 1     | ID05 | 1     | QH05 | 0.47  |
| EG08 | 0.99  | GZ13 | 1     | HK10 | 1     | ID11 | 1     | VN04 | 0.52  |

### Supplementary References

- 1 WHO Global Influenza Surveillance Network. *Manual for the laboratory diagnosis and virological surveillance of influenza.* (2011).
- 2 Peter Bogner, I. C., David J. Lipman, Nancy J. Cox. A global initiative on sharing avian flu data. *Nature* **442** (2006).
- 3 Enright, A. J., Van Dongen, S. & Ouzounis, C. A. An efficient algorithm for large-scale detection of protein families. *Nucleic Acids Res* **30**, 1575-1584 (2002).
- 4 Ndifon, W., Dushoff, J. & Levin, S. A. On the use of hemagglutination-inhibition for influenza surveillance: surveillance data are predictive of influenza vaccine effectiveness. *Vaccine* **27**, 2447-2452, doi:10.1016/j.vaccine.2009.02.047 (2009).
